# Supplementary material for: Functionally impaired plasmacytoid dendritic cells and non-haematopoietic sources of type I interferon characterize human autoimmunity
Source: PubMed Central journal article supplement (PMC7708979; doi:10.1038/s41467-020-19918-z), 2020-12-01
Supplement: 41467_2020_19918_MOESM2_ESM.pdf [file 41467_2020_19918_MOESM2_ESM.pdf]

## Reporting Summary

Nature Research wishes to improve the reproducibility of the work that we publish. This form provides structure for consistency and transparency in reporting. For further information on Nature Research policies, see our [Editorial Policies](#) and the [Editorial Policy Checklist](#).

### Statistics

For all statistical analyses, confirm that the following items are present in the figure legend, table legend, main text, or Methods section.

n/a Confirmed

- The exact sample size ( $n$ ) for each experimental group/condition, given as a discrete number and unit of measurement
- A statement on whether measurements were taken from distinct samples or whether the same sample was measured repeatedly
- The statistical test(s) used AND whether they are one- or two-sided  
*Only common tests should be described solely by name; describe more complex techniques in the Methods section.*
- A description of all covariates tested
- A description of any assumptions or corrections, such as tests of normality and adjustment for multiple comparisons
- A full description of the statistical parameters including central tendency (e.g. means) or other basic estimates (e.g. regression coefficient) AND variation (e.g. standard deviation) or associated estimates of uncertainty (e.g. confidence intervals)
- For null hypothesis testing, the test statistic (e.g.  $F$ ,  $t$ ,  $r$ ) with confidence intervals, effect sizes, degrees of freedom and  $P$  value noted  
*Give  $P$  values as exact values whenever suitable.*
- For Bayesian analysis, information on the choice of priors and Markov chain Monte Carlo settings
- For hierarchical and complex designs, identification of the appropriate level for tests and full reporting of outcomes
- Estimates of effect sizes (e.g. Cohen's  $d$ , Pearson's  $r$ ), indicating how they were calculated

*Our web collection on [statistics for biologists](#) contains articles on many of the points above.*

### Software and code

Policy information about [availability of computer code](#)

Data collection

Microsoft Excel  
Prism 7 Graphpad Software, Inc. <https://www.graphpad.com/>

Data analysis

Prism 7 Graphpad Software, Inc. <https://www.graphpad.com/>  
FACS DiVA BD Biosciences <http://www.bdbiosciences.com/>  
CytExpert 2.0 Beckman Coulter <https://www.beckman.com/>  
Fluidigm Real Time PCR Analysis Fluidigm <https://www.fluidigm.com/software>  
FastQC BaseSpace Labs <https://www.illumina.com/>  
Cutadapt Cutadapt <http://cutadapt.readthedocs.io/en/stable/index.html/>  
Table Browser UCSC Genome Browser <https://genome.ucsc.edu/>  
QualiMap 2.0 QualiMap <http://qualimap.bioinfo.cipf.es/>  
Picard tools Broad Institute <https://broadinstitute.github.io/picard/>  
ReactomePA Bioconductor <https://www.bioconductor.org/>  
KEGG Kyoto University <https://www.genome.jp/kegg/>  
Nikon NIS Elements Nikon Instruments <https://www.nikoninstruments.com/>

For manuscripts utilizing custom algorithms or software that are central to the research but not yet described in published literature, software must be made available to editors and reviewers. We strongly encourage code deposition in a community repository (e.g. GitHub). See the Nature Research [guidelines for submitting code & software](#) for further information.

## Data

Policy information about [availability of data](#)

All manuscripts must include a [data availability statement](#). This statement should provide the following information, where applicable:

- Accession codes, unique identifiers, or web links for publicly available datasets
- A list of figures that have associated raw data
- A description of any restrictions on data availability

Please see the Source Data file for raw data for each figure. RNA-sequencing data are available in BioProject, <https://www.ncbi.nlm.nih.gov/bioproject>, accession number PRJNA645252. A key resources table is provided in Supplemental Table 8. Any other data are available on request from the authors.

## Field-specific reporting

Please select the one below that is the best fit for your research. If you are not sure, read the appropriate sections before making your selection.

- Life sciences       Behavioural & social sciences       Ecological, evolutionary & environmental sciences

For a reference copy of the document with all sections, see [nature.com/documents/nr-reporting-summary-flat.pdf](https://www.nature.com/documents/nr-reporting-summary-flat.pdf)

## Life sciences study design

All studies must disclose on these points even when the disclosure is negative.

|                 |                                                                                                                                                                                                                                                                                     |
|-----------------|-------------------------------------------------------------------------------------------------------------------------------------------------------------------------------------------------------------------------------------------------------------------------------------|
| Sample size     | No sample size calculation was undertaken                                                                                                                                                                                                                                           |
| Data exclusions | No data were excluded from the analysis                                                                                                                                                                                                                                             |
| Replication     | We presented multiple replicates for all experiments. We provided confirmation by additional techniques for key findings                                                                                                                                                            |
| Randomization   | Samples were collected randomly from individuals in known, specified diagnostic groups. There was no randomisation of individuals to treatment as this was not appropriate for the experimental design. Detailed analysis of various clinical subgroups has been shown in Figure 1. |
| Blinding        | Lab analysis was undertaken blind to diagnostic group                                                                                                                                                                                                                               |

## Reporting for specific materials, systems and methods

We require information from authors about some types of materials, experimental systems and methods used in many studies. Here, indicate whether each material, system or method listed is relevant to your study. If you are not sure if a list item applies to your research, read the appropriate section before selecting a response.

### Materials & experimental systems

| n/a                                 | Involved in the study                                           |
|-------------------------------------|-----------------------------------------------------------------|
| <input type="checkbox"/>            | <input checked="" type="checkbox"/> Antibodies                  |
| <input checked="" type="checkbox"/> | <input type="checkbox"/> Eukaryotic cell lines                  |
| <input checked="" type="checkbox"/> | <input type="checkbox"/> Palaeontology and archaeology          |
| <input checked="" type="checkbox"/> | <input type="checkbox"/> Animals and other organisms            |
| <input type="checkbox"/>            | <input checked="" type="checkbox"/> Human research participants |
| <input type="checkbox"/>            | <input checked="" type="checkbox"/> Clinical data               |
| <input checked="" type="checkbox"/> | <input type="checkbox"/> Dual use research of concern           |

### Methods

| n/a                                 | Involved in the study                              |
|-------------------------------------|----------------------------------------------------|
| <input checked="" type="checkbox"/> | <input type="checkbox"/> ChIP-seq                  |
| <input type="checkbox"/>            | <input checked="" type="checkbox"/> Flow cytometry |
| <input checked="" type="checkbox"/> | <input type="checkbox"/> MRI-based neuroimaging    |

## Antibodies

Antibodies used

Anti-human CD3 clone BW264/56, VioBlue Miltenyi Biotec Cat# 130-094-363  
 Anti-human CD3 clone BW264/56, VioGreen Miltenyi Biotec Cat# 130-096-910  
 Anti-human CD4 clone M-T466, APC-Vio770 Miltenyi Biotec Cat# 130-100-457  
 Anti-human CD19 clone LT19, VioBlue Miltenyi Biotec Cat# 130-098-598  
 Anti-human CD14 clone TÜK4, VioBlue Miltenyi Biotec Cat# 130-094-364  
 Anti-human CD56 clone B159, BV450 BD Biosciences Cat# 560360  
 Anti-human CD11c clone MJ4-27G12, VioBlue Miltenyi Biotec Cat# 130-097-328  
 Anti-human HLA-DR clone AC122, APC-Vio770 Miltenyi Biotec Cat# 130-104-200  
 Anti-human CD123 clone AC145, PerCP-Vio700 Miltenyi Biotec Cat# 130-103-802  
 Anti-human CD303 (BDCA-2) clone AC144, FITC Miltenyi Biotec Cat# 130-090-510  
 Anti-human CD304 (BDCA-4) clone AD5-17F6, VioBright FITC Miltenyi Biotec Cat# 130-104-272

Anti-human CD85g clone REA100, PE-Vio770 Miltenyi Biotec Cat# 130-099-009  
 Anti-human CD85j clone GHI/75, PE-Vio770 Miltenyi Biotec Cat# 130-101-552  
 Anti-human CD69 clone FN50, FITC Miltenyi Biotec Cat# 130-092-166  
 Anti-human CD25 clone 4E3, PE Miltenyi Biotec Cat# 130-091-024  
 Anti-human CD317 clone RS38E, PE BioLegend Cat# 348406  
 Anti-human IFN- $\alpha$  clone LT27:295, APC Miltenyi Biotec Cat# 130-092-602  
 Anti-human TNF- $\alpha$  cA2, PE-Vio770 Miltenyi Biotec Cat# 130-096-755  
 Anti-human IL-6 clone MQ2-13A5, PE Miltenyi Biotec Cat# 130-096-086  
 Anti-human IFN- $\gamma$  clone 45-15, APC Miltenyi Biotec Cat# 130-091-640  
 Anti-human IL-10 clone JES3-9D7, PE Miltenyi Biotec Cat# 130-096-043  
 Anti-human TNF- $\alpha$  clone Mab11, APC/Cy7 BioLegend Cat# 502944  
 Anti-human IFN- $\gamma$  clone 4S.B3, PE/Cy7 BioLegend Cat# 502528  
 Anti-human IL-17A clone BL168, APC BioLegend Cat# 512334  
 Anti-human TLR9 clone eB72-1665, APC BD Biosciences Cat# 560428  
 Anti-human TLR7 clone 533707, PE R&D Cat# IC5875P  
 Anti-human FoxP3 clone 3G3, APC Miltenyi Biotec Cat# 130-093-013  
 Human TNF alpha antibody clone 1825 R&D Systems Cat# MAB210-SP

Validation

See supplementary information

## Human research participants

Policy information about [studies involving human research participants](#)

Population characteristics

Peripheral blood and skin biopsies were obtained from healthy individuals and patients from different disease groups (SLE, pSS, At-Risk). Patients were recruited based on 2012 SLICC classification criteria for SLE, 2016 ACR/EULAR classification criteria for pSS, while At-Risk individuals were classified as ANA positive,<sup>1</sup> SLE clinical criterion, symptom duration <12 months and treatment-naïve. Supplemental Table 1 summarizes the characteristics and treatment of SLE patients.

Recruitment

All participants attending the clinic during the study were invited to participate. Recruitment flow chart for the At Risk individuals has previously been published (PMID: 29929956)

Ethics oversight

Leeds East – National Research Ethics Committee (REC 10/H1306/88)

Note that full information on the approval of the study protocol must also be provided in the manuscript.

## Clinical data

Policy information about [clinical studies](#)

All manuscripts should comply with the ICMJE [guidelines for publication of clinical research](#) and a completed [CONSORT checklist](#) must be included with all submissions.

Clinical trial registration

This was not a clinical trial.

Study protocol

The study protocol is available from the corresponding author.

Data collection

Participants attending Leeds Teaching Hospitals Connective Tissue Disease clinic with the relevant diagnoses between 2015 - 2018 were invited to participate. Recruitment flow chart for the At Risk individuals has previously been published (PMID: 29929956)

Outcomes

This was not a clinical trial and did not have primary and secondary clinical outcome measures.

## Flow Cytometry

### Plots

Confirm that:

- The axis labels state the marker and fluorochrome used (e.g. CD4-FITC).
- The axis scales are clearly visible. Include numbers along axes only for bottom left plot of group (a 'group' is an analysis of identical markers).
- All plots are contour plots with outliers or pseudocolor plots.
- A numerical value for number of cells or percentage (with statistics) is provided.

### Methodology

Sample preparation

Human PBMCs were separated from whole blood by a density gradient centrifugation method using Leucosep tubes (Greiner Bio-One). pDCs were purified from freshly isolated PBMCs by negative selection using the Diamond Plasmacytoid Dendritic Cell Isolation Kit II (Miltenyi Biotec). Naïve CD4<sup>+</sup> T cells were purified by negative selection using the Naïve CD4<sup>+</sup> T Cell Isolation Kit II (Miltenyi Biotec). Pre-enriched pDCs were sorted using an antibody to BDCA-4 (Miltenyi Biotec). Cell sorting was carried out at the SCIF Flow Cytometry and Imaging Facility of the Wellcome Trust Brenner Building, University of Leeds, with a BD Influx 6 Way Cell Sorter (BD Biosciences). Cells were cultured in RPMI medium 1640 with GlutaMAX supplement

(ThermoFisher Scientific) containing 10% (vol/vol) FBS and 100 U/ml penicillin/streptomycin. For cytokine production, PBMCs were stimulated with 2  $\mu$ M class A CpG (ODN 2216; Miltenyi Biotec) or 2  $\mu$ M ORN R-2336 (Miltenyi Biotec). For pDC/T-cell co-culture, purified pDCs ( $1 \times 10^5$ ) were cultured with autologous or allogeneic naive CD4+ T cells ( $5 \times 10^5$ ) for 5 days in the absence or presence of anti-CD3/CD28 beads (T cell activation/expansion kit; Miltenyi Biotec) at a bead-to-cell ratio of 1:2. Cytokine production was measured by intracellular staining.

Instrument

LSRII (BD Biosciences) or Cytotflex S (Beckman Coulter)

Software

FACS DiVA (BD Biosciences) or CytExpert (Beckman Coulter)

Cell population abundance

To investigate disease-associated transcriptional changes in pDCs, we purified pDCs from healthy controls ( $n = 8$ ), At-Risk individuals ( $n = 4$ ) and SLE patients ( $n = 13$ ) by negative selection then sorted the cells to achieve purity >99% based on CD304 (BDCA-4) expression.

Gating strategy

pDCs are characterized by the lack of lineage markers CD3 (T cells), CD19 (B cells), CD56 (NK cells), CD14 (monocytes) and CD11c (conventional DCs), intermediate to high expression of HLA-DR (MHC-II), high expression of CD123 (IL-3R) and other markers such as CD303 (BDCA-2) and CD304 (BDCA-4). pDCs were gated as lineage-HLA-DR+CD123+CD303+ cells

Tick this box to confirm that a figure exemplifying the gating strategy is provided in the Supplementary Information.
